# Supplementary material for: Reparative Efficacy of Liposome-Encapsulated Oleanolic Acid against Liver Inflammation Induced by Fine Ambient Particulate Matter and Alcohol in Mice
Source: MDPI journal article supplement (doi:10.3390/pharmaceutics14051108), 2022-05-23
Supplement: s1 [file s1]

## Supplement figures

**a**

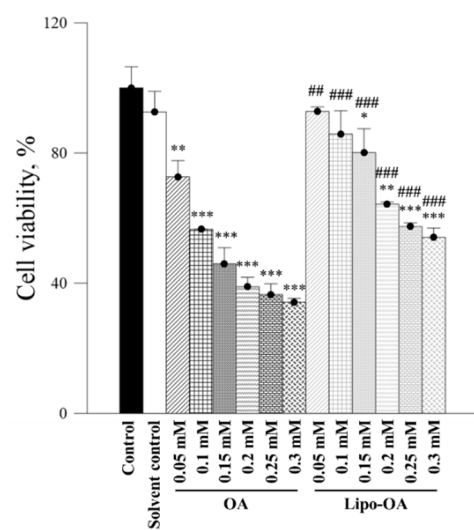

**b**

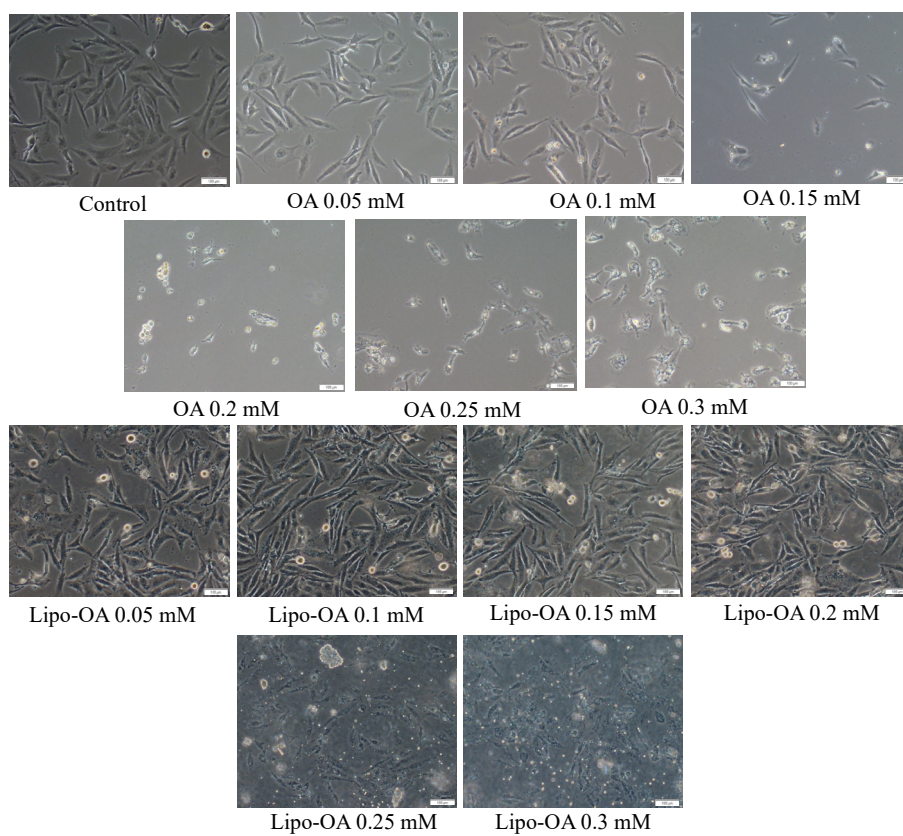

c

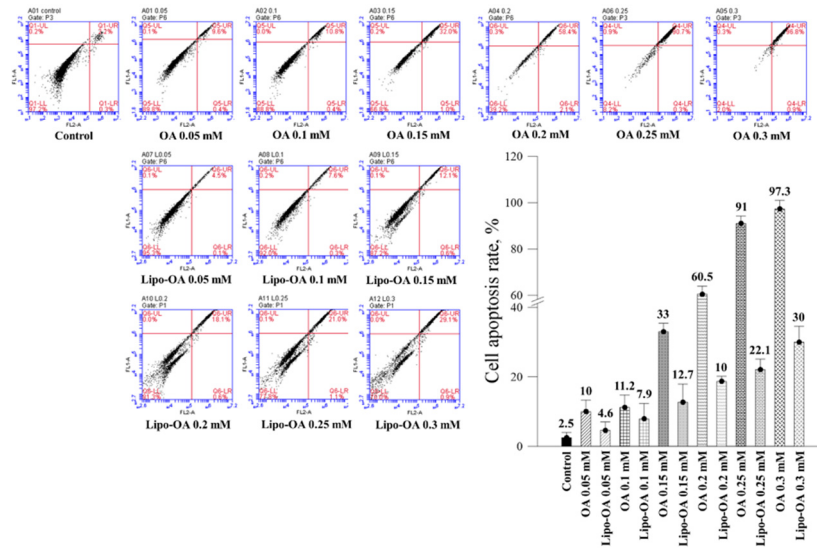

**Figure S1.** (a) MTT assay for OA and Lipo-OAs cytotoxicity. (b) Effects on LX-2 cell morphology monitored through light microscopy (magnification, 100×). (c) Flow cytometry assay for apoptosis in LX-2 cells treated with OA and Lipo-OAs at various concentrations. \*  $p < 0.05$ , \*\*  $p < 0.01$ , \*\*\*  $p < 0.001$  compared with control group. ##  $p < 0.01$ , ###  $p < 0.001$  compared with OA. Solvent control: DMSO solution that used to dissolve OA.

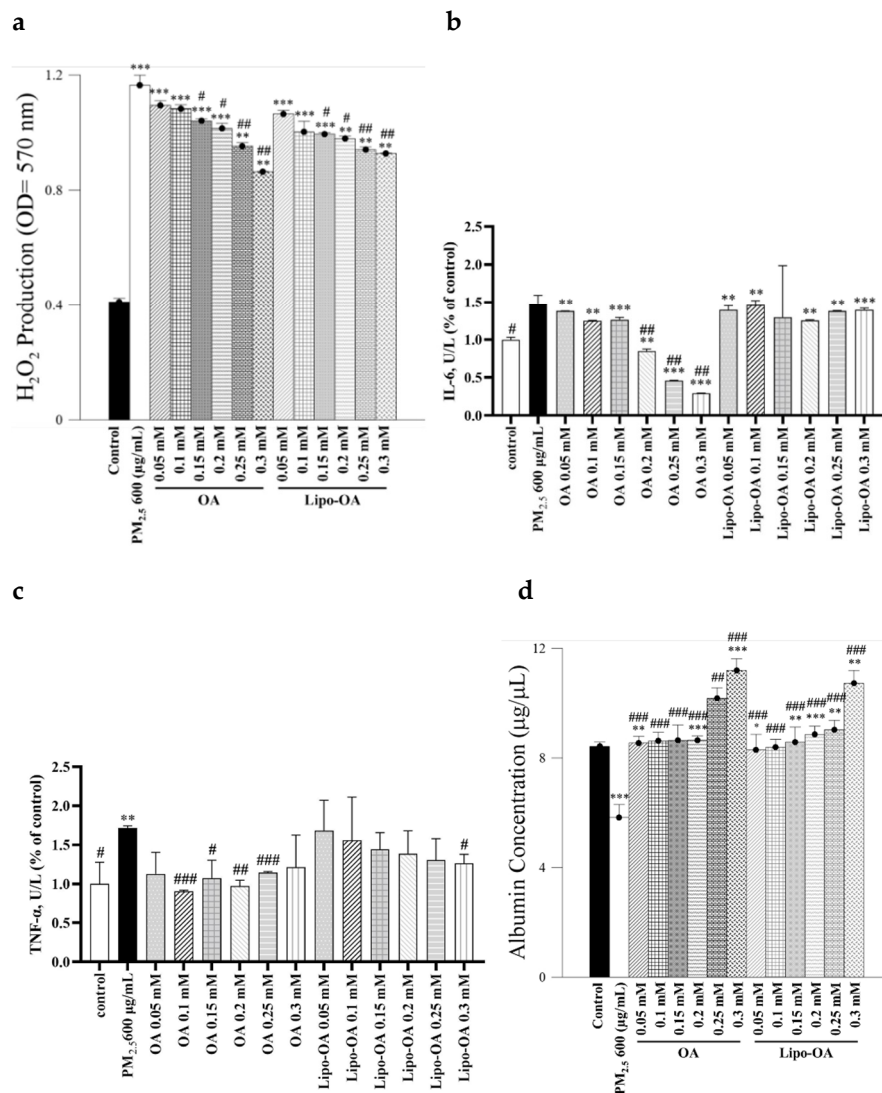

**Figure S2.** (a) Assessment of H<sub>2</sub>O<sub>2</sub> scavenging activity. (b) IL-6 and (c) TNF-α response of LX-2 cells treated with PM<sub>2.5</sub> at various concentrations. (d) Albumin secretion by LX-2 cells with PM<sub>2.5</sub>-induced inflammation after treatment with OA and Lipo-OAs at various concentrations. \*p<0.05, \*\*p<0.01, p\*\*\*<0.001 compared with control group; # p<0.05, ##p<0.01, ###p<0.001 compared with PM<sub>2.5</sub> 600 μg/mL group.



**a**

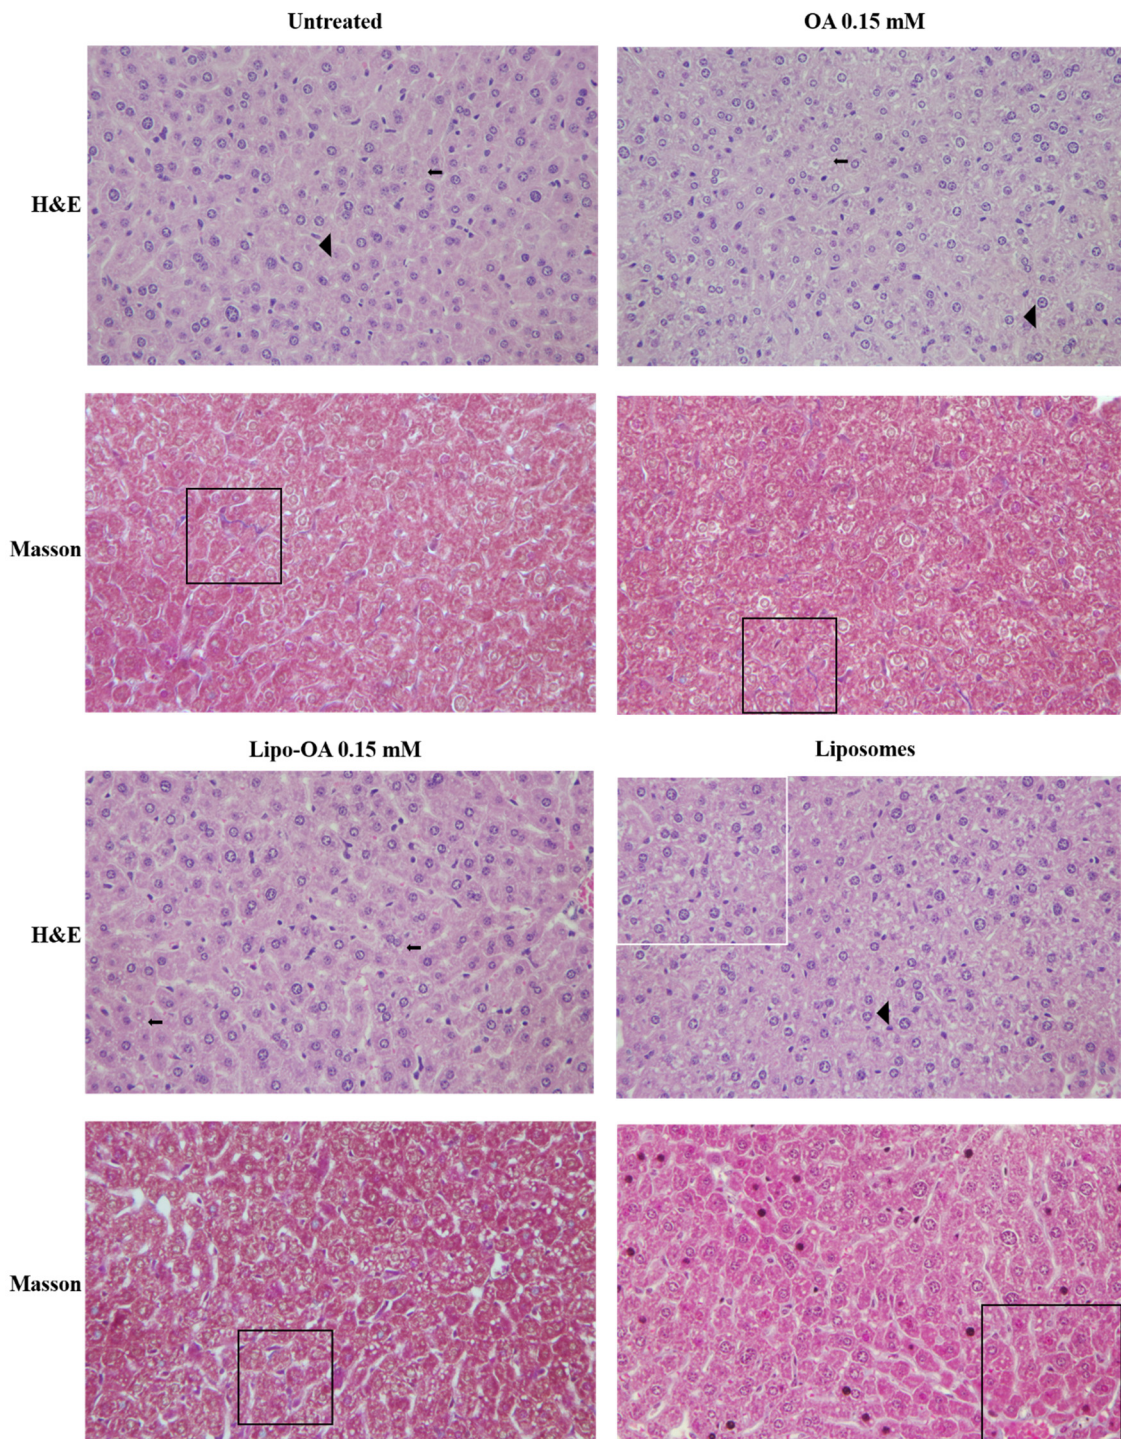



**b**

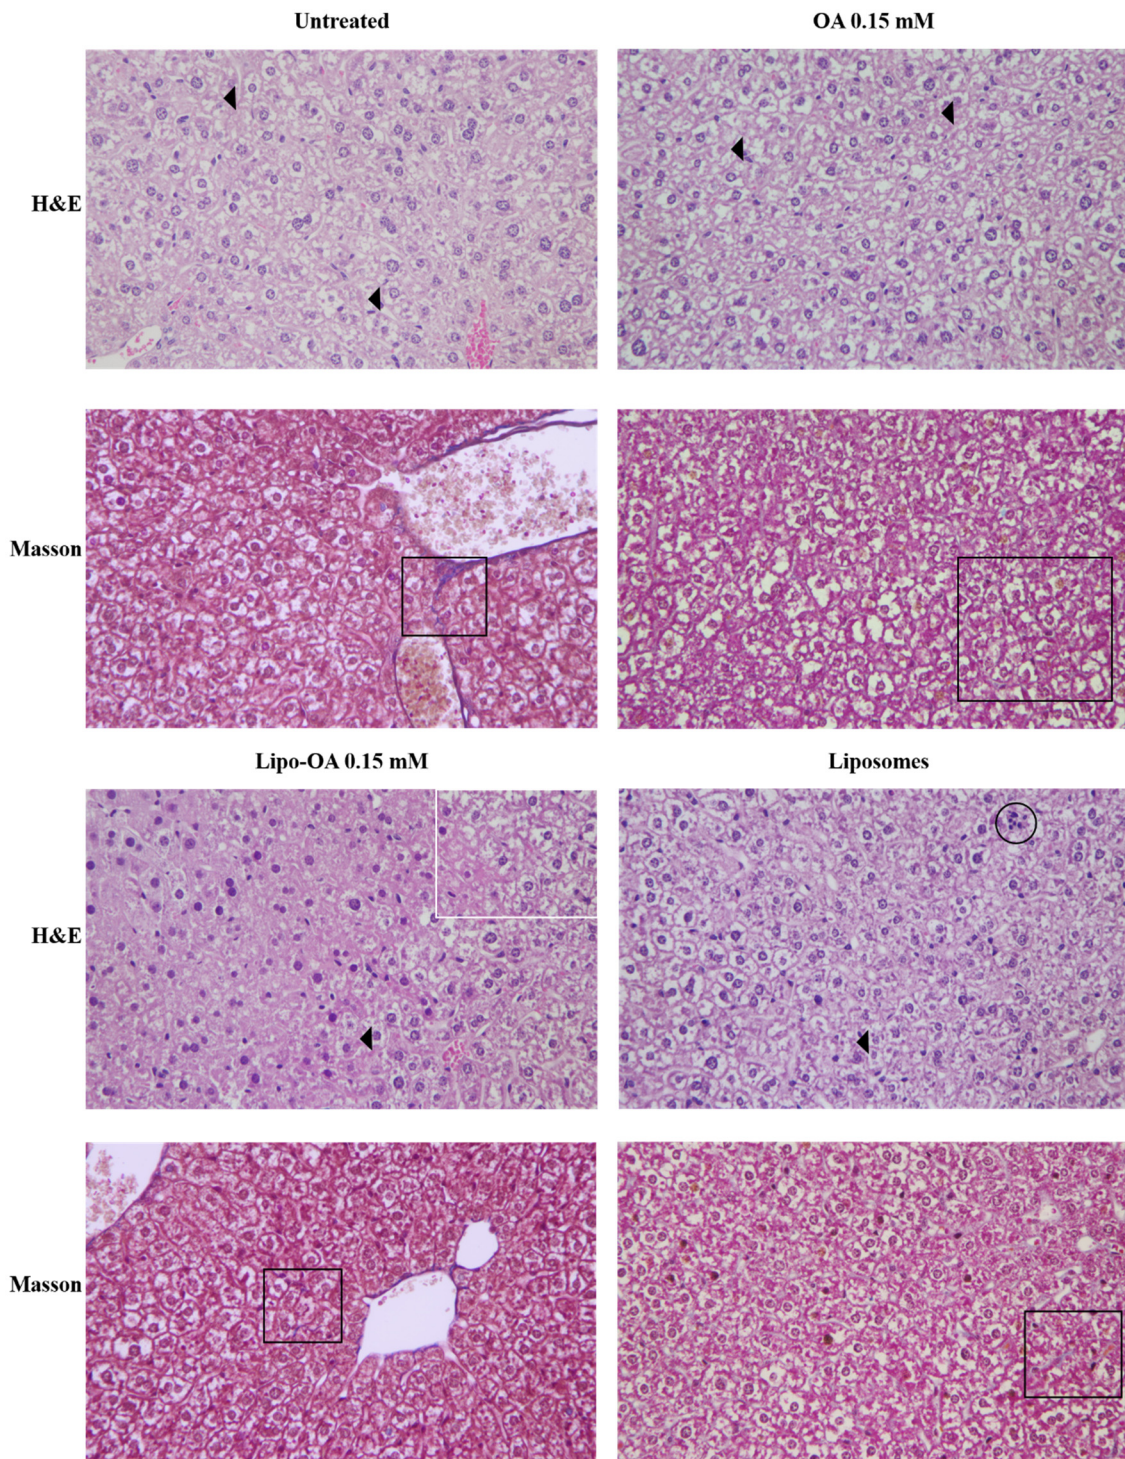

Figure S3. Hematoxylin and eosin (H&E) staining and Masson's trichrome staining of the sections of PM<sub>2.5</sub>-induced inflammation liver treated with OA, Lipo-OAs, or pure liposomes (magnification, 200×): (a) after 4 treatment weeks, and (b) after 6 treatment weeks. The geometric figure was the representative area of: Patchy steatosis (white box), steatosis (black arrow), Mallory bodies and ballooning cells (black arrowhead), necrosis (black circle), single-cell apoptosis (black triangle), and pericellular fibrosis (black box).



**a**

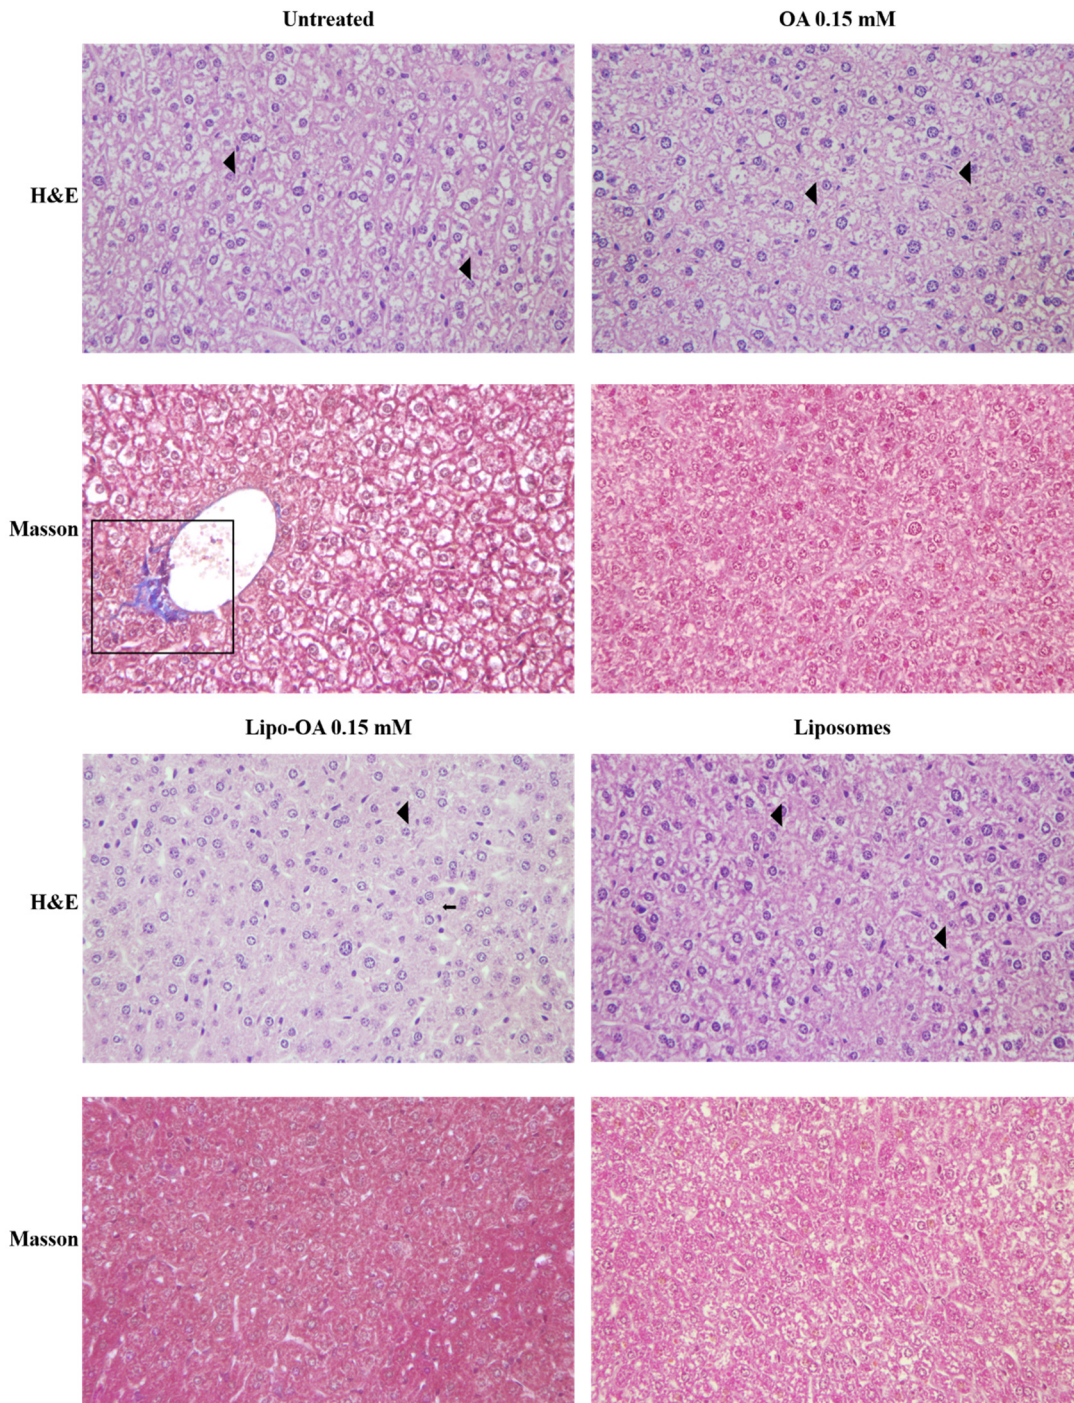



**b**

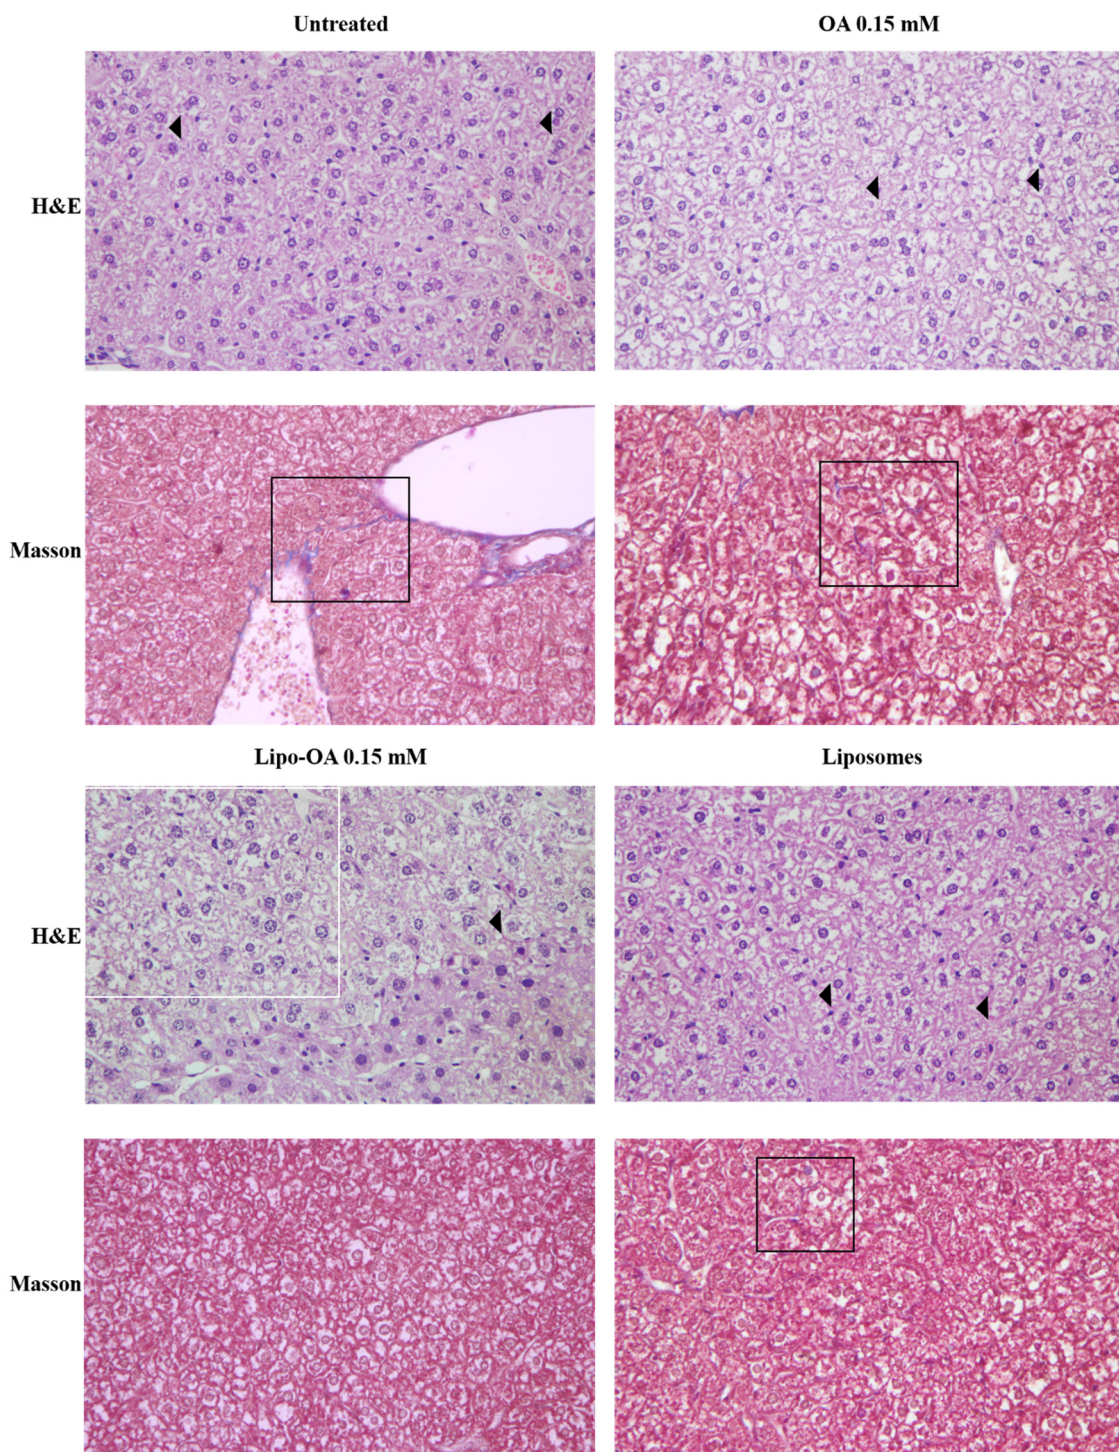

**Figure S4.** H&E staining and Masson's trichrome staining of the sections of PM<sub>2.5</sub> and alcohol-induced inflammation liver treated with OA, Lipo-OAs, or pure liposomes (magnification, 200×): after (a) 4 and (b) 6 treatment weeks. The geometric figure was the representative area of: Patchy steatosis (white box), steatosis (black arrow), Mallory bodies and ballooning cells (black arrowhead), necrosis (black circle), single-cell apoptosis (black triangle), and pericellular fibrosis (black box).
